# Supplementary material for: Engaging Precision Phenotyping to Scrutinize Vegetative Drought Tolerance and Recovery in Chickpea Plant Genetic Resources
Source: MDPI journal article supplement (doi:10.3390/plants12152866), 2023-08-04
Supplement: s1 [file s1]

## Tables S

### Contents

|                                                                                                                                                                       |    |
|-----------------------------------------------------------------------------------------------------------------------------------------------------------------------|----|
| Tables S.....                                                                                                                                                         | 1  |
| Table S1: PAW for experiment 1 and 2 and both experiments.....                                                                                                        | 2  |
| Table S2: Descriptive statistics of image-derived traits for all genotypes and <i>desi</i> and <i>kabuli</i> .<br>.....                                               | 4  |
| Table S3: Descriptive statistics of fresh and dry weight. ....                                                                                                        | 9  |
| Table S4: Descriptive statistics of RGR.....                                                                                                                          | 10 |
| Table S5: Descriptive statistics of WUE for drought phases and chickpea types.....                                                                                    | 12 |
| Table S6: Tukey's test of WUE in different drought phases and for <i>desi</i> and <i>kabuli</i> under<br>drought phase. ....                                          | 13 |
| Table S7: Descriptive statistics of Chlorophyll Fluorescence traits. ....                                                                                             | 15 |
| Table S8: Tukey's test for chlorophyll fluorescence traits .....                                                                                                      | 18 |
| Table S9: Correlations of EB with further image-derived traits during the period of DA, DR<br>and DT.....                                                             | 20 |
| Table S10: Correlation between $\Phi_{PSIIh}$ and image-derived traits.....                                                                                           | 21 |
| Table S11: Superior genotypes for EB and WUE as measured by the difference from the mean<br>of the panel under drought stress compared to the control treatment. .... | 22 |
| Table S12: Description of Plant Material.....                                                                                                                         | 26 |

Table S1: PAW for experiment 1 and 2 and both experiments.

Means among all 60 genotypes. PAW = plant available water

| DAT | experiment 1 |        | experiment 2 |        | both experiments |        |
|-----|--------------|--------|--------------|--------|------------------|--------|
|     | control      | stress | control      | stress | control          | stress |
| 1   | 78.3         | 77.6   | 68.8         | 70.8   | 73.5             | 74.2   |
| 2   | 75.7         | 75.2   | 70.5         | 70.4   | 73.1             | 72.8   |
| 3   | 73.3         | 72.8   | 70.0         | 70.0   | 71.7             | 71.4   |
| 4   | 71.6         | 71.4   | 69.9         | 69.9   | 70.7             | 70.6   |
| 5   | 70.7         | 70.8   | 69.8         | 69.9   | 70.2             | 70.3   |
| 6   | 70.4         | 70.5   | 69.8         | 69.8   | 70.1             | 70.2   |
| 7   | 70.4         | 70.4   | 69.9         | 69.9   | 70.1             | 70.1   |
| 8   | 70.7         | 61.3   | 69.7         | 65.3   | 70.2             | 63.3   |
| 9   | 70.6         | 54.8   | 77.5         | 61.2   | 74.0             | 58.0   |
| 10  | 70.6         | 48.4   | 78.2         | 57.0   | 74.4             | 52.7   |
| 11  | 70.6         | 42.7   | 78.3         | 52.6   | 74.5             | 47.6   |
| 12  | 70.7         | 37.5   | 78.3         | 48.7   | 74.5             | 43.1   |
| 13  | 70.7         | 32.7   | 78.3         | 44.7   | 74.5             | 38.7   |
| 14  | 70.5         | 29.7   | 78.3         | 41.7   | 74.4             | 35.7   |
| 15  | 70.8         | 25.6   | 78.0         | 37.4   | 74.4             | 31.5   |
| 16  | 70.6         | 23.1   | 78.1         | 34.0   | 74.3             | 28.6   |
| 17  | 70.7         | 20.7   | 78.1         | 31.1   | 74.4             | 25.9   |
| 18  | 70.7         | 18.6   | 78.0         | 28.5   | 74.4             | 23.5   |
| 19  | 70.6         | 17.0   | 77.9         | 26.1   | 74.3             | 21.5   |
| 20  | 70.5         | 15.6   | 77.9         | 23.8   | 74.2             | 19.7   |
| 21  | 70.5         | 14.4   | 78.0         | 22.1   | 74.3             | 18.2   |
| 22  | 70.4         | 13.5   | 77.4         | 19.6   | 73.9             | 16.5   |
| 23  | 70.4         | 12.7   | 77.3         | 17.8   | 73.9             | 15.3   |
| 24  | 70.5         | 11.9   | 77.2         | 16.1   | 73.8             | 14.0   |
| 25  | 70.2         | 11.4   | 77.3         | 14.8   | 73.8             | 13.1   |
| 26  | 70.1         | 11.1   | 77.5         | 13.9   | 73.8             | 12.5   |
| 27  | 70.1         | 10.8   | 76.4         | 12.4   | 73.2             | 11.6   |
| 28  | 70.0         | 10.7   | 77.5         | 12.0   | 73.8             | 11.3   |
| 29  | 69.1         | 10.5   | 68.6         | 33.1   | 68.9             | 21.8   |
| 30  | 69.0         | 67.5   | 67.8         | 64.3   | 68.4             | 65.9   |
| 31  | 69.3         | 69.9   | 68.0         | 68.7   | 68.6             | 69.3   |
| 32  | 69.1         | 69.9   | 67.7         | 69.1   | 68.4             | 69.5   |
| 33  | 68.8         | 69.9   | 67.6         | 69.0   | 68.2             | 69.5   |
| 34  | 68.8         | 69.8   | 67.1         | 68.8   | 68.0             | 69.3   |
| 35  | 69.1         | 69.9   | 68.3         | 69.2   | 68.7             | 69.6   |
| 36  | 69.0         | 69.9   | 66.9         | 68.5   | 67.9             | 69.2   |

|    |      |      |      |      |      |      |
|----|------|------|------|------|------|------|
| 37 | 68.6 | 69.7 | 66.8 | 68.4 | 67.7 | 69.1 |
| 38 | 68.9 | 69.8 | 66.8 | 68.3 | 67.9 | 69.1 |
| 39 | 68.7 | 69.8 | 66.5 | 67.9 | 67.6 | 68.8 |
| 40 | 68.6 | 69.7 | 67.0 | 68.2 | 67.7 | 68.8 |
| 41 | 68.4 | 69.6 | 67.5 | 68.7 | 68.0 | 69.1 |
| 42 | 68.9 | 69.7 | 66.3 | 67.8 | 67.6 | 68.8 |

Table S2: Descriptive statistics of image-derived traits for all genotypes and *desi* and *kabuli*.

Based on BLUEs across both experiments and all 60 genotypes. q1= Quantile 25%; q3= Quantile 75%; sd=standard deviation. Loss [%] = (1-(stress/control))\*100

| trait | DAT | chickpea      | treatment | min   | q1     | median | mean         | q3     | max    | sd     |
|-------|-----|---------------|-----------|-------|--------|--------|--------------|--------|--------|--------|
| EB    | 7   | all           | control   | 1.83  | 3.5    | 4.23   | <b>4.42</b>  | 5.32   | 7.71   | 1.35   |
| EB    | 7   | all           | stress    | 1.92  | 3.27   | 4.6    | <b>4.45</b>  | 5.11   | 8.58   | 1.47   |
| EB    | 7   | all           | loss      | -4.92 | 6.57   | -8.75  | <b>-0.68</b> | 3.95   | -11.28 | -8.89  |
| EB    | 7   | <i>desi</i>   | control   | 1.83  | 2.89   | 3.56   | <b>3.5</b>   | 4.12   | 5.32   | 0.83   |
| EB    | 7   | <i>desi</i>   | stress    | 1.92  | 2.98   | 3.42   | <b>3.61</b>  | 4.39   | 5.86   | 1.02   |
| EB    | 7   | <i>desi</i>   | loss      | -4.92 | -3.11  | 3.93   | <b>-3.14</b> | -6.55  | -10.15 | -22.89 |
| EB    | 7   | <i>kabuli</i> | control   | 3.53  | 4.5    | 5.28   | <b>5.33</b>  | 5.94   | 7.71   | 1.14   |
| EB    | 7   | <i>kabuli</i> | stress    | 2.82  | 4.67   | 4.99   | <b>5.29</b>  | 6.13   | 8.58   | 1.37   |
| EB    | 7   | <i>kabuli</i> | loss      | 20.11 | -3.78  | 5.49   | <b>0.75</b>  | -3.20  | -11.28 | -20.18 |
| EB    | 28  | all           | control   | 45.94 | 62.06  | 85.99  | <b>85.15</b> | 107.23 | 148.21 | 26.24  |
| EB    | 28  | all           | stress    | 12.69 | 16.48  | 18.13  | <b>18.55</b> | 21.19  | 27.2   | 3.11   |
| EB    | 28  | all           | loss      | 72.38 | 73.45  | 78.92  | <b>78.21</b> | 80.24  | 81.65  | 88.15  |
| EB    | 28  | <i>desi</i>   | control   | 45.94 | 52.57  | 66.89  | <b>70.53</b> | 85.42  | 115.11 | 20.46  |
| EB    | 28  | <i>desi</i>   | stress    | 12.69 | 14.97  | 16.99  | <b>17.07</b> | 18.72  | 22.23  | 2.7    |
| EB    | 28  | <i>desi</i>   | loss      | 72.38 | 71.52  | 74.60  | <b>75.80</b> | 78.08  | 80.69  | 86.80  |
| EB    | 28  | <i>kabuli</i> | control   | 59.3  | 85.36  | 96.67  | <b>99.78</b> | 116.41 | 148.21 | 23.24  |
| EB    | 28  | <i>kabuli</i> | stress    | 16.07 | 17.77  | 19.52  | <b>20.02</b> | 22.28  | 27.2   | 2.79   |
| EB    | 28  | <i>kabuli</i> | loss      | 72.90 | 79.18  | 79.81  | <b>79.94</b> | 80.86  | 81.65  | 87.99  |
| EB    | 42  | all           | control   | 85.76 | 169.67 | 214.89 | <b>214.7</b> | 258.24 | 344.13 | 60.78  |
| EB    | 42  | all           | stress    | 28.17 | 50.92  | 64.45  | <b>63.56</b> | 74.69  | 98.23  | 16.43  |
| EB    | 42  | all           | loss      | 67.15 | 69.99  | 70.01  | <b>70.40</b> | 71.08  | 71.46  | 72.97  |
| EB    | 42  | <i>desi</i>   | control   | 85.76 | 146.71 | 169.81 | <b>182.1</b> | 201.18 | 333.96 | 57.15  |
| EB    | 42  | <i>desi</i>   | stress    | 28.17 | 46.3   | 52.13  | <b>56.42</b> | 68.61  | 98.23  | 17.38  |
| EB    | 42  | <i>desi</i>   | loss      | 67.15 | 68.44  | 69.30  | <b>69.02</b> | 65.90  | 70.59  | 69.59  |

|     |    |               |         |        |        |        |              |        |        |        |
|-----|----|---------------|---------|--------|--------|--------|--------------|--------|--------|--------|
| EB  | 42 | <i>kabuli</i> | control | 152.84 | 221.61 | 246.67 | <b>247.3</b> | 273.52 | 344.13 | 45.27  |
| EB  | 42 | <i>kabuli</i> | stress  | 42.76  | 61.6   | 72.13  | <b>70.69</b> | 75.81  | 93.48  | 11.9   |
| EB  | 42 | <i>kabuli</i> | loss    | 72.02  | 72.20  | 70.76  | <b>71.42</b> | 72.28  | 72.84  | 73.71  |
| MCV | 7  | all           | control | 0.266  | 0.275  | 0.279  | <b>0.279</b> | 0.283  | 0.295  | 0.007  |
| MCV | 7  | all           | stress  | 0.263  | 0.277  | 0.28   | <b>0.281</b> | 0.286  | 0.298  | 0.007  |
| MCV | 7  | all           | loss    | 1.13   | -0.73  | -0.36  | <b>-0.72</b> | -1.06  | -1.02  | 0.00   |
| MCV | 7  | <i>desi</i>   | control | 0.267  | 0.272  | 0.278  | <b>0.279</b> | 0.284  | 0.295  | 0.008  |
| MCV | 7  | <i>desi</i>   | stress  | 0.264  | 0.276  | 0.282  | <b>0.282</b> | 0.288  | 0.295  | 0.008  |
| MCV | 7  | <i>desi</i>   | loss    | 1.12   | -1.47  | -1.44  | <b>-1.08</b> | -1.41  | 0.00   | 0.00   |
| MCV | 7  | <i>kabuli</i> | control | 0.266  | 0.276  | 0.28   | <b>0.28</b>  | 0.283  | 0.292  | 0.006  |
| MCV | 7  | <i>kabuli</i> | stress  | 0.263  | 0.277  | 0.28   | <b>0.28</b>  | 0.283  | 0.298  | 0.007  |
| MCV | 7  | <i>kabuli</i> | loss    | 1.13   | -0.36  | 0.00   | <b>0.00</b>  | 0.00   | -2.05  | -16.67 |
| MCV | 28 | all           | control | 0.265  | 0.275  | 0.28   | <b>0.28</b>  | 0.284  | 0.297  | 0.006  |
| MCV | 28 | all           | stress  | 0.286  | 0.294  | 0.299  | <b>0.298</b> | 0.301  | 0.308  | 0.005  |
| MCV | 28 | all           | loss    | -7.92  | -6.91  | -6.79  | <b>-6.43</b> | -5.99  | -3.70  | 16.67  |
| MCV | 28 | <i>desi</i>   | control | 0.272  | 0.278  | 0.282  | <b>0.281</b> | 0.285  | 0.297  | 0.006  |
| MCV | 28 | <i>desi</i>   | stress  | 0.291  | 0.294  | 0.297  | <b>0.297</b> | 0.3    | 0.308  | 0.004  |
| MCV | 28 | <i>desi</i>   | loss    | -6.99  | -5.76  | -5.32  | <b>-5.69</b> | -5.26  | -3.70  | 33.33  |
| MCV | 28 | <i>kabuli</i> | control | 0.265  | 0.274  | 0.278  | <b>0.278</b> | 0.282  | 0.286  | 0.006  |
| MCV | 28 | <i>kabuli</i> | stress  | 0.286  | 0.294  | 0.299  | <b>0.298</b> | 0.302  | 0.306  | 0.006  |
| MCV | 28 | <i>kabuli</i> | loss    | -7.92  | -7.30  | -7.55  | <b>-7.19</b> | -7.09  | -6.99  | 0.00   |
| MCV | 42 | all           | control | 0.261  | 0.274  | 0.277  | <b>0.277</b> | 0.281  | 0.29   | 0.007  |
| MCV | 42 | all           | stress  | 0.244  | 0.273  | 0.278  | <b>0.276</b> | 0.281  | 0.29   | 0.008  |
| MCV | 42 | all           | loss    | 6.51   | 0.36   | -0.36  | <b>0.36</b>  | 0.00   | 0.00   | -14.29 |
| MCV | 42 | <i>desi</i>   | control | 0.267  | 0.275  | 0.277  | <b>0.278</b> | 0.281  | 0.29   | 0.006  |
| MCV | 42 | <i>desi</i>   | stress  | 0.263  | 0.275  | 0.279  | <b>0.278</b> | 0.283  | 0.29   | 0.007  |
| MCV | 42 | <i>desi</i>   | loss    | 1.50   | 0.00   | -0.72  | <b>0.00</b>  | -0.71  | 0.00   | -16.67 |
| MCV | 42 | <i>kabuli</i> | control | 0.261  | 0.271  | 0.277  | <b>0.277</b> | 0.281  | 0.29   | 0.008  |
| MCV | 42 | <i>kabuli</i> | stress  | 0.244  | 0.272  | 0.278  | <b>0.275</b> | 0.281  | 0.283  | 0.009  |
| MCV | 42 | <i>kabuli</i> | loss    | 6.51   | -0.37  | -0.36  | <b>0.72</b>  | 0.00   | 2.41   | -12.50 |

|     |    |               |         |        |        |        |               |        |        |       |
|-----|----|---------------|---------|--------|--------|--------|---------------|--------|--------|-------|
| PH  | 7  | all           | control | 182.97 | 213.93 | 233.81 | <b>237.02</b> | 256.01 | 317.77 | 31.26 |
| PH  | 7  | all           | stress  | 176.91 | 215.59 | 235.37 | <b>237.26</b> | 252.12 | 334.52 | 31.72 |
| PH  | 7  | all           | loss    | 3.31   | -0.78  | -0.67  | <b>-0.10</b>  | 1.52   | -5.27  | -1.47 |
| PH  | 7  | <i>desi</i>   | control | 182.97 | 207.69 | 228.5  | <b>230.85</b> | 253.92 | 302.11 | 29.71 |
| PH  | 7  | <i>desi</i>   | stress  | 176.91 | 210.27 | 231.5  | <b>229.37</b> | 244.68 | 286.54 | 27.06 |
| PH  | 7  | <i>desi</i>   | loss    | 3.31   | -1.24  | -1.31  | <b>0.64</b>   | 3.64   | 5.15   | 8.92  |
| PH  | 7  | <i>kabuli</i> | control | 189.22 | 220.93 | 240.44 | <b>243.19</b> | 257.98 | 317.77 | 32.03 |
| PH  | 7  | <i>kabuli</i> | stress  | 194.92 | 223.94 | 240.76 | <b>245.16</b> | 260.48 | 334.52 | 34.44 |
| PH  | 7  | <i>kabuli</i> | loss    | -3.01  | -1.36  | -0.13  | <b>-0.81</b>  | -0.97  | -5.27  | -7.52 |
| PH  | 28 | all           | control | 380.2  | 493.1  | 539.62 | <b>544.82</b> | 589.09 | 697.22 | 67.18 |
| PH  | 28 | all           | stress  | 291.66 | 335.68 | 361.64 | <b>367.9</b>  | 379.32 | 561.46 | 54.7  |
| PH  | 28 | all           | loss    | 23.29  | 31.92  | 32.98  | <b>32.47</b>  | 35.61  | 19.47  | 18.58 |
| PH  | 28 | <i>desi</i>   | control | 380.2  | 479.07 | 515.64 | <b>524.12</b> | 575.27 | 697.22 | 67.58 |
| PH  | 28 | <i>desi</i>   | stress  | 291.66 | 328.73 | 357.27 | <b>361.19</b> | 379.42 | 561.46 | 53.73 |
| PH  | 28 | <i>desi</i>   | loss    | 23.29  | 31.38  | 30.71  | <b>31.09</b>  | 34.04  | 19.47  | 20.49 |
| PH  | 28 | <i>kabuli</i> | control | 445.1  | 513.07 | 561.15 | <b>565.52</b> | 615.76 | 671.13 | 61.06 |
| PH  | 28 | <i>kabuli</i> | stress  | 301.47 | 337.01 | 364.52 | <b>374.62</b> | 379.09 | 505.74 | 55.74 |
| PH  | 28 | <i>kabuli</i> | loss    | 32.27  | 34.32  | 35.04  | <b>33.76</b>  | 38.44  | 24.64  | 8.71  |
| PH  | 42 | all           | control | 454.4  | 638.33 | 683.08 | <b>695.9</b>  | 743.27 | 908.82 | 88.93 |
| PH  | 42 | all           | stress  | 335.11 | 436.31 | 472.96 | <b>484.92</b> | 499.08 | 716.27 | 81.67 |
| PH  | 42 | all           | loss    | 26.25  | 31.65  | 30.76  | <b>30.32</b>  | 32.85  | 21.19  | 8.16  |
| PH  | 42 | <i>desi</i>   | control | 454.4  | 615.11 | 653.74 | <b>670.17</b> | 727.24 | 886.55 | 90.94 |
| PH  | 42 | <i>desi</i>   | stress  | 335.11 | 428.59 | 471.49 | <b>473.3</b>  | 489.07 | 716.27 | 81.62 |
| PH  | 42 | <i>desi</i>   | loss    | 26.25  | 30.32  | 27.88  | <b>29.38</b>  | 32.75  | 19.21  | 10.25 |
| PH  | 42 | <i>kabuli</i> | control | 597.33 | 671.05 | 697.48 | <b>721.63</b> | 753.39 | 908.82 | 80.31 |
| PH  | 42 | <i>kabuli</i> | stress  | 387.29 | 437.23 | 472.96 | <b>496.53</b> | 530.63 | 708.31 | 81.42 |
| PH  | 42 | <i>kabuli</i> | loss    | 35.16  | 34.84  | 32.19  | <b>31.19</b>  | 29.57  | 22.06  | -1.38 |
| r2g | 7  | all           | control | 0.018  | 0.025  | 0.027  | <b>0.028</b>  | 0.03   | 0.043  | 0.005 |
| r2g | 7  | all           | stress  | 0.016  | 0.025  | 0.028  | <b>0.028</b>  | 0.03   | 0.041  | 0.005 |
| r2g | 7  | all           | loss    | 11.11  | 0.00   | -3.70  | <b>0.00</b>   | 0.00   | 4.65   | 0.00  |

|     |    |               |         |         |         |         |                |         |         |         |
|-----|----|---------------|---------|---------|---------|---------|----------------|---------|---------|---------|
| r2g | 7  | <i>desi</i>   | control | 0.024   | 0.026   | 0.029   | <b>0.03</b>    | 0.032   | 0.043   | 0.005   |
| r2g | 7  | <i>desi</i>   | stress  | 0.019   | 0.025   | 0.028   | <b>0.029</b>   | 0.032   | 0.041   | 0.005   |
| r2g | 7  | <i>desi</i>   | loss    | 20.83   | 3.85    | 3.45    | <b>3.33</b>    | 0.00    | 4.65    | 0.00    |
| r2g | 7  | <i>kabuli</i> | control | 0.018   | 0.023   | 0.025   | <b>0.026</b>   | 0.028   | 0.035   | 0.004   |
| r2g | 7  | <i>kabuli</i> | stress  | 0.016   | 0.024   | 0.027   | <b>0.026</b>   | 0.029   | 0.035   | 0.004   |
| r2g | 7  | <i>kabuli</i> | loss    | 11.11   | -4.35   | -8.00   | <b>0.00</b>    | -3.57   | 0.00    | 0.00    |
| r2g | 28 | all           | control | 0.003   | 0.004   | 0.005   | <b>0.005</b>   | 0.006   | 0.011   | 0.002   |
| r2g | 28 | all           | stress  | 0.008   | 0.011   | 0.013   | <b>0.013</b>   | 0.015   | 0.021   | 0.003   |
| r2g | 28 | all           | loss    | -166.67 | -175.00 | -160.00 | <b>-160.00</b> | -150.00 | -90.91  | -50.00  |
| r2g | 28 | <i>desi</i>   | control | 0.003   | 0.005   | 0.006   | <b>0.006</b>   | 0.007   | 0.011   | 0.002   |
| r2g | 28 | <i>desi</i>   | stress  | 0.008   | 0.012   | 0.015   | <b>0.014</b>   | 0.016   | 0.021   | 0.003   |
| r2g | 28 | <i>desi</i>   | loss    | -166.67 | -140.00 | -150.00 | <b>-133.33</b> | -128.57 | -90.91  | -50.00  |
| r2g | 28 | <i>kabuli</i> | control | 0.003   | 0.004   | 0.005   | <b>0.005</b>   | 0.005   | 0.006   | 0.001   |
| r2g | 28 | <i>kabuli</i> | stress  | 0.008   | 0.011   | 0.012   | <b>0.012</b>   | 0.014   | 0.019   | 0.003   |
| r2g | 28 | <i>kabuli</i> | loss    | -166.67 | -175.00 | -140.00 | <b>-140.00</b> | -180.00 | -216.67 | -200.00 |
| r2g | 42 | all           | control | 0.002   | 0.003   | 0.004   | <b>0.004</b>   | 0.004   | 0.006   | 0.001   |
| r2g | 42 | all           | stress  | 0.003   | 0.005   | 0.005   | <b>0.006</b>   | 0.007   | 0.011   | 0.002   |
| r2g | 42 | all           | loss    | -50.00  | -66.67  | -25.00  | <b>-50.00</b>  | -75.00  | -83.33  | -100.00 |
| r2g | 42 | <i>desi</i>   | control | 0.002   | 0.003   | 0.004   | <b>0.004</b>   | 0.005   | 0.006   | 0.001   |
| r2g | 42 | <i>desi</i>   | stress  | 0.003   | 0.005   | 0.006   | <b>0.006</b>   | 0.007   | 0.011   | 0.002   |
| r2g | 42 | <i>desi</i>   | loss    | -50.00  | -66.67  | -50.00  | <b>-50.00</b>  | -40.00  | -83.33  | -100.00 |
| r2g | 42 | <i>kabuli</i> | control | 0.002   | 0.003   | 0.003   | <b>0.003</b>   | 0.004   | 0.004   | 0.001   |
| r2g | 42 | <i>kabuli</i> | stress  | 0.004   | 0.005   | 0.005   | <b>0.005</b>   | 0.005   | 0.011   | 0.001   |
| r2g | 42 | <i>kabuli</i> | loss    | -100.00 | -66.67  | -66.67  | <b>-66.67</b>  | -25.00  | -175.00 | 0.00    |
| y2g | 7  | all           | control | 0.063   | 0.074   | 0.079   | <b>0.083</b>   | 0.089   | 0.136   | 0.013   |
| y2g | 7  | all           | stress  | 0.051   | 0.072   | 0.082   | <b>0.08</b>    | 0.088   | 0.112   | 0.011   |
| y2g | 7  | all           | loss    | 19.05   | 2.70    | -3.80   | <b>3.61</b>    | 1.12    | 17.65   | 15.38   |
| y2g | 7  | <i>desi</i>   | control | 0.071   | 0.078   | 0.086   | <b>0.088</b>   | 0.095   | 0.136   | 0.013   |
| y2g | 7  | <i>desi</i>   | stress  | 0.067   | 0.077   | 0.084   | <b>0.084</b>   | 0.09    | 0.112   | 0.01    |
| y2g | 7  | <i>desi</i>   | loss    | 5.63    | 1.28    | 2.33    | <b>4.55</b>    | 5.26    | 17.65   | 23.08   |

|     |    |               |         |         |         |         |                |         |         |         |
|-----|----|---------------|---------|---------|---------|---------|----------------|---------|---------|---------|
| y2g | 7  | <i>kabuli</i> | control | 0.063   | 0.071   | 0.075   | <b>0.077</b>   | 0.083   | 0.103   | 0.01    |
| y2g | 7  | <i>kabuli</i> | stress  | 0.051   | 0.07    | 0.077   | <b>0.077</b>   | 0.088   | 0.093   | 0.011   |
| y2g | 7  | <i>kabuli</i> | loss    | 19.05   | 1.41    | -2.67   | <b>0.00</b>    | -6.02   | 9.71    | -10.00  |
| y2g | 28 | all           | control | 0.019   | 0.026   | 0.028   | <b>0.029</b>   | 0.032   | 0.047   | 0.006   |
| y2g | 28 | all           | stress  | 0.042   | 0.06    | 0.069   | <b>0.069</b>   | 0.078   | 0.115   | 0.015   |
| y2g | 28 | all           | loss    | -121.05 | -130.77 | -146.43 | <b>-137.93</b> | -143.75 | -144.68 | -150.00 |
| y2g | 28 | <i>desi</i>   | control | 0.023   | 0.028   | 0.032   | <b>0.032</b>   | 0.036   | 0.047   | 0.006   |
| y2g | 28 | <i>desi</i>   | stress  | 0.042   | 0.066   | 0.072   | <b>0.073</b>   | 0.083   | 0.115   | 0.017   |
| y2g | 28 | <i>desi</i>   | loss    | -82.61  | -135.71 | -125.00 | <b>-128.13</b> | -130.56 | -144.68 | -183.33 |
| y2g | 28 | <i>kabuli</i> | control | 0.019   | 0.024   | 0.026   | <b>0.026</b>   | 0.028   | 0.036   | 0.004   |
| y2g | 28 | <i>kabuli</i> | stress  | 0.045   | 0.057   | 0.065   | <b>0.065</b>   | 0.074   | 0.092   | 0.011   |
| y2g | 28 | <i>kabuli</i> | loss    | -136.84 | -137.50 | -150.00 | <b>-150.00</b> | -164.29 | -155.56 | -175.00 |
| y2g | 42 | all           | control | 0.022   | 0.027   | 0.029   | <b>0.029</b>   | 0.031   | 0.042   | 0.004   |
| y2g | 42 | all           | stress  | 0.024   | 0.033   | 0.037   | <b>0.038</b>   | 0.042   | 0.064   | 0.008   |
| y2g | 42 | all           | loss    | -9.09   | -22.22  | -27.59  | <b>-31.03</b>  | -35.48  | -52.38  | -100.00 |
| y2g | 42 | <i>desi</i>   | control | 0.022   | 0.028   | 0.031   | <b>0.031</b>   | 0.033   | 0.042   | 0.005   |
| y2g | 42 | <i>desi</i>   | stress  | 0.027   | 0.034   | 0.04    | <b>0.04</b>    | 0.046   | 0.064   | 0.009   |
| y2g | 42 | <i>desi</i>   | loss    | -22.73  | -21.43  | -29.03  | <b>-29.03</b>  | -39.39  | -52.38  | -80.00  |
| y2g | 42 | <i>kabuli</i> | control | 0.022   | 0.026   | 0.028   | <b>0.028</b>   | 0.029   | 0.031   | 0.003   |
| y2g | 42 | <i>kabuli</i> | stress  | 0.024   | 0.032   | 0.035   | <b>0.036</b>   | 0.041   | 0.047   | 0.005   |
| y2g | 42 | <i>kabuli</i> | loss    | -9.09   | -23.08  | -25.00  | <b>-28.57</b>  | -41.38  | -51.61  | -66.67  |



Table S3: Descriptive statistics of fresh and dry weight.

Based on BLUEs across both experiments and all 60 genotypes. Fresh and dry weight in gram; Loss [%] =  $(1 - (\text{stress}/\text{control})) \times 100$ . q1= Quantile 25%; q3= Quantile 75%; sd=standard deviation.

|               | control |       | stress |      | loss  |       |
|---------------|---------|-------|--------|------|-------|-------|
|               | fresh   | dry   | fresh  | dry  | fresh | dry   |
| <b>min</b>    | 35.33   | 5.43  | 14.05  | 1.93 | 60.23 | 64.46 |
| <b>q1</b>     | 44.42   | 7.18  | 19.31  | 2.92 | 56.53 | 59.33 |
| <b>median</b> | 55.35   | 8.8   | 21.48  | 3.23 | 61.19 | 63.30 |
| <b>mean</b>   | 53.99   | 8.84  | 21.48  | 3.25 | 60.21 | 63.24 |
| <b>q3</b>     | 61.97   | 10.55 | 23.77  | 3.61 | 61.64 | 65.78 |
| <b>max</b>    | 77.28   | 12.58 | 27.83  | 4.23 | 63.99 | 66.38 |

Table S4: Descriptive statistics of RGR.

Based on BLUEs across both experiments and all 60 genotypes.

$$\text{RGR} [\text{voxel} / \text{DAT}] = \text{relative growth rate} = (\ln(\text{EB}_i) - \ln(\text{EB}_{i-1})) / (\text{DAT}_i - \text{DAT}_{i-1})$$

|     | stress |       | control |      |
|-----|--------|-------|---------|------|
| DAT | EB     | RGR   | EB      | RGR  |
| 1   | 1.09   | NA    | 1.09    | NA   |
| 2   | 2.18   | 0.69  | 2.17    | 0.69 |
| 3   | 2.62   | 0.18  | 2.60    | 0.18 |
| 4   | 3.18   | 0.20  | 3.20    | 0.21 |
| 5   | 3.61   | 0.13  | 3.57    | 0.11 |
| 6   | 3.94   | 0.09  | 3.87    | 0.08 |
| 7   | 4.45   | 0.12  | 4.42    | 0.13 |
| 8   | 5.74   | 0.25  | 5.79    | 0.27 |
| 9   | 6.75   | 0.16  | 6.82    | 0.16 |
| 10  | 7.61   | 0.12  | 7.95    | 0.15 |
| 11  | 8.75   | 0.14  | 9.37    | 0.16 |
| 12  | 9.86   | 0.12  | 10.72   | 0.13 |
| 13  | 10.85  | 0.10  | 12.74   | 0.17 |
| 14  | 11.81  | 0.08  | 14.87   | 0.15 |
| 15  | 12.76  | 0.08  | 17.00   | 0.13 |
| 16  | 13.11  | 0.03  | 18.69   | 0.09 |
| 17  | 14.12  | 0.07  | 21.98   | 0.16 |
| 18  | 15.00  | 0.06  | 26.19   | 0.18 |
| 19  | 15.94  | 0.06  | 30.69   | 0.16 |
| 20  | 16.47  | 0.03  | 35.35   | 0.14 |
| 21  | 17.29  | 0.05  | 40.15   | 0.13 |
| 22  | 16.74  | -0.03 | 43.27   | 0.07 |
| 23  | 17.52  | 0.05  | 50.51   | 0.15 |
| 24  | 17.37  | -0.01 | 55.31   | 0.09 |
| 25  | 17.50  | 0.01  | 60.55   | 0.09 |

|    |       |       |        |      |
|----|-------|-------|--------|------|
| 26 | 18.67 | 0.06  | 70.25  | 0.15 |
| 27 | 17.55 | -0.06 | 75.68  | 0.07 |
| 28 | 18.55 | 0.06  | 85.15  | 0.12 |
| 29 | 17.53 | -0.06 | 88.83  | 0.04 |
| 30 | 21.30 | 0.19  | 98.38  | 0.10 |
| 31 | 23.55 | 0.10  | 108.75 | 0.10 |
| 32 | 25.72 | 0.09  | 117.26 | 0.08 |
| 33 | 28.20 | 0.09  | 129.29 | 0.10 |
| 34 | 30.34 | 0.07  | 134.51 | 0.04 |
| 35 | 33.49 | 0.10  | 145.15 | 0.08 |
| 36 | 37.35 | 0.11  | 156.21 | 0.07 |
| 37 | 41.42 | 0.10  | 164.74 | 0.05 |
| 38 | 45.51 | 0.09  | 178.28 | 0.08 |
| 39 | 49.46 | 0.08  | 190.28 | 0.07 |
| 40 | 54.58 | 0.10  | 204.61 | 0.07 |
| 41 | 59.90 | 0.09  | 208.08 | 0.02 |
| 42 | 63.56 | 0.06  | 214.70 | 0.03 |

Table S5: Descriptive statistics of WUE for drought phases and chickpea types.

Based on BLUEs across both experiments and all 60 genotypes or *desi* and *kabuli*; q1= Quantile 25%; q3= Quantile 75%; sd=standard deviation.

| chickpea      | phase     | treatment | min   | q1     | median | mean          | q3     | max    | sd    |
|---------------|-----------|-----------|-------|--------|--------|---------------|--------|--------|-------|
| all           | <b>DA</b> | control   | 0.019 | 0.033  | 0.037  | <b>0.038</b>  | 0.042  | 0.058  | 0.008 |
|               |           | stress    | 0.025 | 0.035  | 0.039  | <b>0.039</b>  | 0.044  | 0.061  | 0.007 |
| all           | <b>DR</b> | control   | 0.015 | 0.032  | 0.039  | <b>0.040</b>  | 0.046  | 0.068  | 0.011 |
|               |           | stress    | 0.012 | 0.022  | 0.026  | <b>0.026</b>  | 0.030  | 0.043  | 0.007 |
| all           | <b>DT</b> | control   | 0.022 | 0.029  | 0.033  | <b>0.033</b>  | 0.038  | 0.048  | 0.006 |
|               |           | stress    | 0.215 | 7.603  | 11.699 | <b>9.630</b>  | 12.831 | 16.765 | 5.455 |
| <i>desi</i>   | <b>DA</b> | control   | 0.019 | 0.030  | 0.035  | <b>0.036</b>  | 0.041  | 0.052  | 0.008 |
|               |           | stress    | 0.025 | 0.032  | 0.036  | <b>0.037</b>  | 0.042  | 0.052  | 0.007 |
| <i>kabuli</i> | <b>DA</b> | control   | 0.029 | 0.036  | 0.039  | <b>0.041</b>  | 0.045  | 0.058  | 0.007 |
|               |           | stress    | 0.029 | 0.038  | 0.041  | <b>0.042</b>  | 0.044  | 0.061  | 0.006 |
| <i>desi</i>   | <b>DR</b> | control   | 0.015 | 0.031  | 0.038  | <b>0.038</b>  | 0.046  | 0.061  | 0.011 |
|               |           | stress    | 0.012 | 0.018  | 0.023  | <b>0.024</b>  | 0.028  | 0.038  | 0.007 |
| <i>kabuli</i> | <b>DR</b> | control   | 0.025 | 0.035  | 0.041  | <b>0.043</b>  | 0.048  | 0.068  | 0.011 |
|               |           | stress    | 0.016 | 0.026  | 0.027  | <b>0.028</b>  | 0.030  | 0.043  | 0.005 |
| <i>desi</i>   | <b>DT</b> | control   | 0.022 | 0.026  | 0.030  | <b>0.030</b>  | 0.034  | 0.041  | 0.005 |
|               |           | stress    | 0.587 | 10.829 | 12.025 | <b>11.495</b> | 13.195 | 15.713 | 3.466 |
| <i>kabuli</i> | <b>DT</b> | control   | 0.025 | 0.033  | 0.036  | <b>0.036</b>  | 0.039  | 0.048  | 0.005 |
|               |           | stress    | 0.215 | 0.595  | 10.943 | <b>7.765</b>  | 12.494 | 16.765 | 6.428 |

Table S6: Tukey's test of WUE in different drought phases and for desi and kabuli under drought phase.

ANOVA describes whether there was a significant influence in general of the WUE and the phase / *desi* and *kabuli*, the WUE and the two treatments, and the phase / *desi* and *kabuli* and the treatments.

|              | combination                          | diff   | p adj        | ANOVA |
|--------------|--------------------------------------|--------|--------------|-------|
| <b>phase</b> | DR-DA                                | -0.006 | 1.000        | ***   |
|              | DT-DA                                | 4.833  | <b>0.000</b> | ***   |
|              | DT-DR                                | 4.839  | <b>0.000</b> | ***   |
|              | stress-control                       | 3.186  | <b>0.000</b> | ***   |
|              | DR:control-DA:control                | 0.002  | 1.000        | ***   |
|              | DT:control-DA:control                | -0.005 | 1.000        | ***   |
|              | DA:stress-DA:control                 | 0.001  | 1.000        | ***   |
|              | DR:stress-DA:control                 | -0.012 | 1.000        | ***   |
|              | DT:stress-DA:control                 | 9.592  | <b>0.000</b> | ***   |
|              | DT:control-DR:control                | -0.007 | 1.000        | ***   |
|              | DA:stress-DR:control                 | -0.001 | 1.000        | ***   |
|              | DR:stress-DR:control                 | -0.014 | 1.000        | ***   |
|              | DT:stress-DR:control                 | 9.590  | <b>0.000</b> | ***   |
|              | DA:stress-DT:control                 | 0.006  | 1.000        | ***   |
|              | DR:stress-DT:control                 | -0.007 | 1.000        | ***   |
|              | DT:stress-DT:control                 | 9.597  | <b>0.000</b> | ***   |
|              | DR:stress-DA:stress                  | -0.013 | 1.000        | ***   |
|              | DT:stress-DA:stress                  | 9.591  | <b>0.000</b> | ***   |
|              | DT:stress-DR:stress                  | 9.604  | <b>0.000</b> | ***   |
|              | DT:stress-DR:stress                  | 9.604  | <b>0.000</b> | ***   |
| <b>DT</b>    | <i>kabuli- desi</i>                  | -1.797 | <b>0.009</b> | **    |
|              | stress-control                       | 9.612  | <b>0.000</b> | ***   |
|              | <i>kabuli:control- desi:control</i>  | 0.005  | 1.000        | **    |
|              | <i>desi:stress- desi:control</i>     | 11.464 | <b>0.000</b> | **    |
|              | <i>kabuli:stress- desi:control</i>   | 7.735  | <b>0.000</b> | **    |
|              | <i>desi:stress- kabuli:control</i>   | 11.459 | <b>0.000</b> | **    |
|              | <i>kabuli:stress- kabuli:control</i> | 7.729  | <b>0.000</b> | **    |
|              | <i>kabuli:stress- desi:stress</i>    | -3.730 | <b>0.001</b> | **    |
| <b>DR</b>    | <i>kabuli - desi</i>                 | 0.005  | <b>0.004</b> | **    |
|              | stress-control                       | -0.014 | <b>0.000</b> | ***   |
|              | <i>kabuli:control- desi:control</i>  | 0.004  | 0.204        |       |
|              | <i>desi:stress- desi:control</i>     | -0.015 | <b>0.000</b> |       |
|              | <i>kabuli:stress- desi:control</i>   | -0.010 | <b>0.000</b> |       |
|              | <i>desi:stress- kabuli:control</i>   | -0.019 | <b>0.000</b> |       |
|              | <i>kabuli:stress- kabuli:control</i> | -0.014 | <b>0.000</b> |       |

|           |                                      |        |              |            |
|-----------|--------------------------------------|--------|--------------|------------|
|           | <i>kabuli:stress- desi:stress</i>    | 0.005  | 0.146        |            |
| <b>DA</b> | <b><i>kabuli - desi</i></b>          | 0.005  | <b>0.000</b> | <b>***</b> |
|           | stress-control                       | 0.001  | 0.313        |            |
|           | <i>kabuli:control- desi:control</i>  | 0.005  | <b>0.034</b> |            |
|           | <i>desi:stress- desi:control</i>     | 0.002  | 0.841        |            |
|           | <i>kabuli:stress- desi:control</i>   | 0.006  | <b>0.005</b> |            |
|           | <i>desi:stress- kabuli:control</i>   | -0.004 | 0.218        |            |
|           | <i>kabuli:stress- kabuli:control</i> | 0.001  | 0.931        |            |
|           | <i>kabuli:stress- desi:stress</i>    | 0.005  | 0.056        |            |

**Table S7: Descriptive statistics of Chlorophyll Fluorescence traits.** Based on BLUEs across both experiments and all genotypes or *desi* and *kabuli* genotypes.

Loss [%] = (1-(stress/control))\*100. q1= Quantile 25%; q3= Quantile 75%; sd=standard deviation.  $\Phi$ PSII = operating efficiency of photosystem II under high and low light condition. Ratio=  $\Phi$ PSIII /  $\Phi$ PSII h

| $\Phi$ PSII | DAT | chickpea      | treatment | min   | q1    | median | mean         | q3    | max   | sd    |
|-------------|-----|---------------|-----------|-------|-------|--------|--------------|-------|-------|-------|
| high        | 6   | all           | control   | 0.41  | 0.46  | 0.47   | <b>0.47</b>  | 0.48  | 0.5   | 0.02  |
| high        | 6   | all           | stress    | 0.42  | 0.47  | 0.47   | <b>0.47</b>  | 0.48  | 0.51  | 0.02  |
| high        | 6   | all           | loss      | -2.44 | -2.17 | 0.00   | <b>0.00</b>  | 0.00  | -2.00 | 0.00  |
| high        | 6   | <i>desi</i>   | control   | 0.42  | 0.46  | 0.47   | <b>0.47</b>  | 0.48  | 0.49  | 0.02  |
| high        | 6   | <i>desi</i>   | stress    | 0.43  | 0.46  | 0.47   | <b>0.47</b>  | 0.49  | 0.5   | 0.02  |
| high        | 6   | <i>desi</i>   | loss      | -2.38 | 0.00  | 0.00   | <b>0.00</b>  | -2.08 | -2.04 | 0.00  |
| high        | 6   | <i>kabuli</i> | control   | 0.41  | 0.46  | 0.47   | <b>0.47</b>  | 0.48  | 0.5   | 0.02  |
| high        | 6   | <i>kabuli</i> | stress    | 0.42  | 0.47  | 0.47   | <b>0.47</b>  | 0.48  | 0.51  | 0.02  |
| high        | 6   | <i>kabuli</i> | loss      | -2.44 | -2.17 | 0.00   | <b>0.00</b>  | 0.00  | -2.00 | 0.00  |
| high        | 13  | all           | control   | 0.39  | 0.43  | 0.44   | <b>0.44</b>  | 0.46  | 0.48  | 0.02  |
| high        | 13  | all           | stress    | 0.4   | 0.44  | 0.45   | <b>0.44</b>  | 0.45  | 0.48  | 0.02  |
| high        | 13  | all           | loss      | -2.56 | -2.33 | -2.27  | <b>0.00</b>  | 2.17  | 0.00  | 0.00  |
| high        | 13  | <i>desi</i>   | control   | 0.39  | 0.44  | 0.44   | <b>0.44</b>  | 0.45  | 0.48  | 0.02  |
| high        | 13  | <i>desi</i>   | stress    | 0.4   | 0.44  | 0.45   | <b>0.45</b>  | 0.46  | 0.48  | 0.02  |
| high        | 13  | <i>desi</i>   | loss      | -2.56 | 0.00  | -2.27  | <b>-2.27</b> | -2.22 | 0.00  | 0.00  |
| high        | 13  | <i>kabuli</i> | control   | 0.4   | 0.43  | 0.44   | <b>0.44</b>  | 0.46  | 0.48  | 0.02  |
| high        | 13  | <i>kabuli</i> | stress    | 0.4   | 0.44  | 0.45   | <b>0.44</b>  | 0.45  | 0.46  | 0.02  |
| high        | 13  | <i>kabuli</i> | loss      | 0.00  | -2.33 | -2.27  | <b>0.00</b>  | 2.17  | 4.17  | 0.00  |
| high        | 20  | all           | control   | 0.36  | 0.42  | 0.43   | <b>0.43</b>  | 0.45  | 0.47  | 0.03  |
| high        | 20  | all           | stress    | 0.34  | 0.39  | 0.4    | <b>0.4</b>   | 0.42  | 0.44  | 0.02  |
| high        | 20  | all           | loss      | 5.56  | 7.14  | 6.98   | <b>6.98</b>  | 6.67  | 6.38  | 33.33 |
| high        | 20  | <i>desi</i>   | control   | 0.36  | 0.42  | 0.44   | <b>0.43</b>  | 0.45  | 0.47  | 0.03  |
| high        | 20  | <i>desi</i>   | stress    | 0.36  | 0.39  | 0.4    | <b>0.4</b>   | 0.42  | 0.44  | 0.02  |

|      |    |               |         |        |       |       |              |       |       |        |
|------|----|---------------|---------|--------|-------|-------|--------------|-------|-------|--------|
| high | 20 | <i>desi</i>   | loss    | 0.00   | 7.14  | 9.09  | <b>6.98</b>  | 6.67  | 6.38  | 33.33  |
| high | 20 | <i>kabuli</i> | control | 0.37   | 0.41  | 0.43  | <b>0.43</b>  | 0.45  | 0.47  | 0.03   |
| high | 20 | <i>kabuli</i> | stress  | 0.34   | 0.38  | 0.4   | <b>0.4</b>   | 0.41  | 0.43  | 0.02   |
| high | 20 | <i>kabuli</i> | loss    | 8.11   | 7.32  | 6.98  | <b>6.98</b>  | 8.89  | 8.51  | 33.33  |
| high | 27 | all           | control | 0.38   | 0.42  | 0.44  | <b>0.44</b>  | 0.46  | 0.49  | 0.03   |
| high | 27 | all           | stress  | 0.27   | 0.34  | 0.35  | <b>0.35</b>  | 0.38  | 0.41  | 0.03   |
| high | 27 | all           | loss    | 28.95  | 19.05 | 20.45 | <b>20.45</b> | 17.39 | 16.33 | 0.00   |
| high | 27 | <i>desi</i>   | control | 0.38   | 0.42  | 0.44  | <b>0.44</b>  | 0.46  | 0.49  | 0.03   |
| high | 27 | <i>desi</i>   | stress  | 0.31   | 0.34  | 0.35  | <b>0.36</b>  | 0.38  | 0.4   | 0.03   |
| high | 27 | <i>desi</i>   | loss    | 18.42  | 19.05 | 20.45 | <b>18.18</b> | 17.39 | 18.37 | 0.00   |
| high | 27 | <i>kabuli</i> | control | 0.39   | 0.42  | 0.43  | <b>0.43</b>  | 0.45  | 0.48  | 0.02   |
| high | 27 | <i>kabuli</i> | stress  | 0.27   | 0.33  | 0.35  | <b>0.35</b>  | 0.38  | 0.41  | 0.03   |
| high | 27 | <i>kabuli</i> | loss    | 30.77  | 21.43 | 18.60 | <b>18.60</b> | 15.56 | 14.58 | -50.00 |
| high | 34 | all           | control | 0.35   | 0.41  | 0.43  | <b>0.43</b>  | 0.45  | 0.49  | 0.03   |
| high | 34 | all           | stress  | 0.39   | 0.42  | 0.43  | <b>0.43</b>  | 0.44  | 0.48  | 0.02   |
| high | 34 | all           | loss    | -11.43 | -2.44 | 0.00  | <b>0.00</b>  | 2.22  | 2.04  | 33.33  |
| high | 34 | <i>desi</i>   | control | 0.35   | 0.41  | 0.43  | <b>0.43</b>  | 0.46  | 0.49  | 0.03   |
| high | 34 | <i>desi</i>   | stress  | 0.41   | 0.43  | 0.44  | <b>0.44</b>  | 0.45  | 0.48  | 0.02   |
| high | 34 | <i>desi</i>   | loss    | -17.14 | -4.88 | -2.33 | <b>-2.33</b> | 2.17  | 2.04  | 33.33  |
| high | 34 | <i>kabuli</i> | control | 0.36   | 0.41  | 0.42  | <b>0.42</b>  | 0.45  | 0.48  | 0.03   |
| high | 34 | <i>kabuli</i> | stress  | 0.39   | 0.41  | 0.43  | <b>0.43</b>  | 0.44  | 0.47  | 0.02   |
| high | 34 | <i>kabuli</i> | loss    | -8.33  | 0.00  | -2.38 | <b>-2.38</b> | 2.22  | 2.08  | 33.33  |
| low  | 6  | all           | control | 0.6    | 0.62  | 0.63  | <b>0.63</b>  | 0.63  | 0.65  | 0.01   |
| low  | 6  | all           | stress  | 0.6    | 0.62  | 0.62  | <b>0.62</b>  | 0.63  | 0.65  | 0.01   |
| low  | 6  | all           | loss    | 0.00   | 0.00  | 1.59  | <b>1.59</b>  | 0.00  | 0.00  | 0.00   |
| low  | 13 | all           | control | 0.61   | 0.63  | 0.63  | <b>0.64</b>  | 0.64  | 0.66  | 0.01   |
| low  | 13 | all           | stress  | 0.62   | 0.64  | 0.64  | <b>0.64</b>  | 0.65  | 0.67  | 0.01   |
| low  | 13 | all           | loss    | -1.64  | -1.59 | -1.59 | <b>0.00</b>  | -1.56 | -1.52 | 0.00   |
| low  | 20 | all           | control | 0.62   | 0.64  | 0.65  | <b>0.65</b>  | 0.65  | 0.67  | 0.01   |
| low  | 20 | all           | stress  | 0.57   | 0.61  | 0.62  | <b>0.62</b>  | 0.63  | 0.66  | 0.02   |



|       |    |     |         |        |        |        |               |       |       |         |
|-------|----|-----|---------|--------|--------|--------|---------------|-------|-------|---------|
| low   | 20 | all | loss    | 8.06   | 4.69   | 4.62   | <b>4.62</b>   | 3.08  | 1.49  | -100.00 |
| low   | 27 | all | control | 0.62   | 0.64   | 0.65   | <b>0.65</b>   | 0.66  | 0.67  | 0.01    |
| low   | 27 | all | stress  | 0.51   | 0.55   | 0.57   | <b>0.57</b>   | 0.58  | 0.61  | 0.02    |
| low   | 27 | all | loss    | 17.74  | 14.06  | 12.31  | <b>12.31</b>  | 12.12 | 8.96  | -100.00 |
| low   | 34 | all | control | 0.61   | 0.63   | 0.64   | <b>0.64</b>   | 0.65  | 0.66  | 0.01    |
| low   | 34 | all | stress  | 0.61   | 0.63   | 0.63   | <b>0.63</b>   | 0.64  | 0.65  | 0.01    |
| low   | 34 | all | loss    | 0.00   | 0.00   | 1.56   | <b>1.56</b>   | 1.54  | 1.52  | 0.00    |
| ratio | 6  | all | control | 1.24   | 1.31   | 1.34   | <b>1.34</b>   | 1.36  | 1.53  | 0.06    |
| ratio | 6  | all | stress  | 1.21   | 1.3    | 1.33   | <b>1.33</b>   | 1.35  | 1.52  | 0.06    |
| ratio | 6  | all | loss    | 2.42   | 0.76   | 0.75   | <b>0.75</b>   | 0.74  | 0.65  | 0.00    |
| ratio | 13 | all | control | 1.31   | 1.39   | 1.44   | <b>1.44</b>   | 1.48  | 1.71  | 0.08    |
| ratio | 13 | all | stress  | 1.33   | 1.41   | 1.44   | <b>1.45</b>   | 1.47  | 1.66  | 0.07    |
| ratio | 13 | all | loss    | -1.53  | -1.44  | 0.00   | <b>-0.69</b>  | 0.68  | 2.92  | 12.50   |
| ratio | 20 | all | control | 1.33   | 1.43   | 1.5    | <b>1.52</b>   | 1.57  | 1.83  | 0.11    |
| ratio | 20 | all | stress  | 1.41   | 1.51   | 1.56   | <b>1.56</b>   | 1.61  | 1.81  | 0.09    |
| ratio | 20 | all | loss    | -6.02  | -5.59  | -4.00  | <b>-2.63</b>  | -2.55 | 1.09  | 18.18   |
| ratio | 27 | all | control | 1.27   | 1.41   | 1.49   | <b>1.49</b>   | 1.57  | 1.76  | 0.11    |
| ratio | 27 | all | stress  | 1.44   | 1.57   | 1.65   | <b>1.65</b>   | 1.7   | 1.91  | 0.11    |
| ratio | 27 | all | loss    | -13.39 | -11.35 | -10.74 | <b>-10.74</b> | -8.28 | -8.52 | 0.00    |
| ratio | 34 | all | control | 1.27   | 1.41   | 1.48   | <b>1.5</b>    | 1.59  | 1.86  | 0.14    |
| ratio | 34 | all | stress  | 1.27   | 1.43   | 1.47   | <b>1.47</b>   | 1.51  | 1.7   | 0.07    |
| ratio | 34 | all | loss    | 0.00   | -1.42  | 0.68   | <b>2.00</b>   | 5.03  | 8.60  | 50.00   |

**Table S8: Tukey's test for chlorophyll fluorescence traits**

Based on BLUEs across for both experiments. ANOVA describes whether there was a significant influence of the WUE and the phase / *desi* and *kabuli*, the WUE and the two treatments, and the phase / *desi* and *kabuli* and the treatments.

$\Phi$ PSII = operating efficiency of photosystem II under high light condition.

| $\Phi$ PSII | combination           | diff   | p adj        | ANOVA |
|-------------|-----------------------|--------|--------------|-------|
| high        | 13-6                  | -0.027 | <b>0.000</b> | ***   |
|             | 20-6                  | -0.055 | <b>0.000</b> | ***   |
|             | 27-6                  | -0.075 | <b>0.000</b> | ***   |
|             | 34-6                  | -0.039 | <b>0.000</b> | ***   |
|             | 20-13                 | -0.028 | <b>0.000</b> | ***   |
|             | 27-13                 | -0.048 | <b>0.000</b> | ***   |
|             | 34-13                 | -0.013 | <b>0.000</b> | ***   |
|             | 27-20                 | -0.020 | <b>0.000</b> | ***   |
|             | 34-20                 | 0.016  | <b>0.000</b> | ***   |
|             | 34-27                 | 0.035  | <b>0.000</b> | ***   |
|             | stress-control        | -0.021 | <b>0.000</b> | ***   |
|             | 13:control-6:control  | -0.026 | <b>0.000</b> | ***   |
|             | 20:control-6:control  | -0.039 | <b>0.000</b> | ***   |
|             | 27:control-6:control  | -0.031 | <b>0.000</b> | ***   |
|             | 34:control-6:control  | -0.039 | <b>0.000</b> | ***   |
|             | 6:stress-6:control    | 0.004  | 0.994        | ***   |
|             | 13:stress-6:control   | -0.024 | <b>0.000</b> | ***   |
|             | 20:stress-6:control   | -0.068 | <b>0.000</b> | ***   |
|             | 27:stress-6:control   | -0.115 | <b>0.000</b> | ***   |
|             | 34:stress-6:control   | -0.036 | <b>0.000</b> | ***   |
|             | 20:control-13:control | -0.013 | 0.085        | ***   |
|             | 27:control-13:control | -0.005 | 0.967        | ***   |
|             | 34:control-13:control | -0.013 | 0.058        | ***   |
|             | 6:stress-13:control   | 0.030  | <b>0.000</b> | ***   |
|             | 13:stress-13:control  | 0.002  | 1.000        | ***   |
|             | 20:stress-13:control  | -0.042 | <b>0.000</b> | ***   |
|             | 27:stress-13:control  | -0.089 | <b>0.000</b> | ***   |
|             | 34:stress-13:control  | -0.010 | 0.365        | ***   |
|             | 27:control-20:control | 0.007  | 0.764        | ***   |
|             | 34:control-20:control | -0.001 | 1.000        | ***   |
|             | 6:stress-20:control   | 0.043  | <b>0.000</b> | ***   |
|             | 13:stress-20:control  | 0.015  | <b>0.024</b> | ***   |
|             | 20:stress-20:control  | -0.029 | <b>0.000</b> | ***   |
|             | 27:stress-20:control  | -0.076 | <b>0.000</b> | ***   |
|             | 34:stress-20:control  | 0.003  | 1.000        | ***   |
|             | 34:control-27:control | -0.008 | 0.677        | ***   |
|             | 6:stress-27:control   | 0.035  | <b>0.000</b> | ***   |

|               |                           |        |              |     |
|---------------|---------------------------|--------|--------------|-----|
|               | 13:stress-27:control      | 0.007  | 0.816        | *** |
|               | 20:stress-27:control      | -0.037 | <b>0.000</b> | *** |
|               | 27:stress-27:control      | -0.083 | <b>0.000</b> | *** |
|               | 34:stress-27:control      | -0.005 | 0.984        | *** |
|               | 6:stress-34:control       | 0.043  | <b>0.000</b> | *** |
|               | 13:stress-34:control      | 0.015  | <b>0.015</b> | *** |
|               | 20:stress-34:control      | -0.029 | <b>0.000</b> | *** |
|               | 27:stress-34:control      | -0.075 | <b>0.000</b> | *** |
|               | 34:stress-34:control      | 0.003  | 0.999        | *** |
|               | 13:stress-6:stress        | -0.028 | <b>0.000</b> | *** |
|               | 20:stress-6:stress        | -0.072 | <b>0.000</b> | *** |
|               | 27:stress-6:stress        | -0.119 | <b>0.000</b> | *** |
|               | 34:stress-6:stress        | -0.040 | <b>0.000</b> | *** |
|               | 20:stress-13:stress       | -0.044 | <b>0.000</b> | *** |
|               | 27:stress-13:stress       | -0.091 | <b>0.000</b> | *** |
|               | 34:stress-13:stress       | -0.012 | 0.150        | *** |
|               | 27:stress-20:stress       | -0.047 | <b>0.000</b> | *** |
|               | 34:stress-20:stress       | 0.032  | <b>0.000</b> | *** |
|               | 34:stress-27:stress       | 0.079  | <b>0.000</b> | *** |
| <b>DAT 6</b>  | <b><i>kabuli-desi</i></b> | -0.005 | 0.112        |     |
|               | stress-control            | -0.021 | <b>0.000</b> | *** |
| <b>DAT 13</b> | <b><i>kabuli-desi</i></b> | -0.001 | 0.766        |     |
|               | stress-control            | 0.002  | 0.601        |     |
| <b>DAT 20</b> | <b><i>kabuli-desi</i></b> | -0.007 | 0.137        |     |
|               | stress-control            | -0.029 | <b>0.000</b> | *** |
| <b>DAT 27</b> | <b><i>kabuli-desi</i></b> | -0.009 | 0.087        |     |
|               | stress-control            | -0.083 | <b>0.000</b> | *** |
| <b>DAT 34</b> | <b><i>kabuli-desi</i></b> | -0.011 | <b>0.026</b> | *   |
|               | stress-control            | 0.003  | 0.485        |     |

Table S9: Correlations of EB with further image-derived traits during the period of DA, DR and DT.

EB [voxel e-05]; PH [mm]; MCV [hue]; R2G [%]; Y2G [%].

The coefficient of correlation  $r$  and the level of significance  $p$ -value ( $*** > 0.001$ ) are displayed. Dark red field means a high positive coefficient of correlation. A dark blue field means a high negative coefficient of correlation.

Based on BLUEs across both experiments and all 60 genotypes. DA=drought adaptability: DAT 8-42; DR=drought recovery DAT 29-42; DT=drought tolerance DAT 8-28.

| Correlation of EB<br>with | DA      |            |        |            | DR      |            |        |            | DT      |            |        |            |
|---------------------------|---------|------------|--------|------------|---------|------------|--------|------------|---------|------------|--------|------------|
|                           | control |            | stress |            | control |            | stress |            | control |            | stress |            |
|                           | $r$     | $p$ -value | $r$    | $p$ -value | $r$     | $p$ -value | $r$    | $p$ -value | $r$     | $p$ -value | $r$    | $p$ -value |
| PH                        | 0.87    | ***        | 0.71   | ***        | 0.7     | ***        | 0.56   | ***        | 0.83    | ***        | 0.58   | ***        |
| MCV                       | -0.64   | ***        | -0.61  | ***        | -0.47   | ***        | -0.72  | ***        | -0.54   | ***        | 0.53   | ***        |
| R2G                       | -0.69   | ***        | -0.74  | ***        | -0.54   | ***        | -0.73  | ***        | -0.76   | ***        | -0.76  | ***        |
| Y2G                       | -0.61   | ***        | -0.54  | ***        | -0.0052 |            | -0.74  | ***        | -0.74   | ***        | -0.33  | ***        |

Table S10: Correlation between  $\Phi$ PSIIh and image-derived traits.

Based on both treatments and BLUEs across both experiments of all 60 genotypes. DAT 6 = 1 day before drought, DAT 13 = 7 days of drought, DAT 20 = 13 days of drought, DAT 27 = 19 days of drought, DAT 34 = 6 days of recovery.  $\phi$ PSIIh = operating efficiency of photosystem II under high light conditions.

Dark red field means a high positive coefficient of correlation  $r$ . A dark blue field means a high negative coefficient of correlation  $r$ . Significant correlations with a  $p$ -value  $< 0.05$  are highlighted in green.

|     | DAT 6 |            | DAT 13 |            | DAT 20 |            | DAT 27 |            | DAT 34 |            |
|-----|-------|------------|--------|------------|--------|------------|--------|------------|--------|------------|
|     | $r$   | $p$ -value | $r$    | $p$ -value | $r$    | $p$ -value | $r$    | $p$ -value | $r$    | $p$ -value |
| EB  | 0.22  | 0.014      | 0.08   | 0.388      | 0.32   | 0.000      | 0.69   | 0.000      | -0.13  | 0.143      |
| PH  | -0.40 | 0.000      | -0.52  | 0.000      | 0.02   | 0.855      | 0.55   | 0.000      | -0.34  | 0.000      |
| MCV | -0.18 | 0.054      | 0.20   | 0.032      | -0.22  | 0.018      | -0.62  | 0.000      | 0.31   | 0.001      |
| r2g | -0.19 | 0.034      | -0.01  | 0.910      | -0.22  | 0.017      | -0.70  | 0.000      | 0.11   | 0.233      |
| y2g | -0.10 | 0.267      | 0.01   | 0.874      | -0.27  | 0.003      | -0.68  | 0.000      | 0.11   | 0.212      |

Table S11: Superior genotypes for EB and WUE as measured by the difference from the mean of the panel under drought stress compared to the control treatment.

Superior genotypes INCCP\_00119, INCCP\_00139, INCCP\_00291 and INCCP\_01917 are highlighted bold. DAT = day after transferring; DAT 28 = longest period of drought stress; DAT 42 = longest period of recovery; WUE = water use efficiency; phase: DA= drought adaptability DAT 8-42; DT= drought tolerance DAT 8-28 and DR= drought recovery DAT 29-42.

| Genotype           | WUE of drought phase | DAT | Difference control | Difference stress | DK            | Country | Geographic Area  | Biological Status |
|--------------------|----------------------|-----|--------------------|-------------------|---------------|---------|------------------|-------------------|
| INCCP_00004        | -                    | 28  | 11.62              | 0.89              | <i>kabuli</i> | ALB     | Balkanica Europe | landrace          |
| INCCP_00006        | -                    | 28  | 32.8               | 0.45              | <i>desi</i>   | BGR     | Balkanica Europe | breeding material |
| INCCP_00009        | -                    | 28  | 26.44              | 1.03              | <i>desi</i>   | EGY     | Nord Africa      | landrace          |
| INCCP_00015        | -                    | 28  | 39.21              | 1.6               | <i>desi</i>   | GRC     | Balkanica Europe | landrace          |
| INCCP_00017        | DT                   | -   | 0.004              | 9.043             | <i>desi</i>   | GRC     | Balkanica Europe | landrace          |
| INCCP_00017        | DR                   | -   | 0.007              | 0.003             | <i>desi</i>   | GRC     | Balkanica Europe | landrace          |
| INCCP_00017        | DA                   | -   | 0.007              | 0.003             | <i>desi</i>   | GRC     | Balkanica Europe | landrace          |
| INCCP_00049        | -                    | 28  | 0.42               | 0.77              | <i>kabuli</i> | ITA     | Italy            | landrace          |
| INCCP_00049        | -                    | 42  | 27.99              | 1.26              | <i>kabuli</i> | ITA     | Italy            | landrace          |
| INCCP_00049        | DR                   | -   | 0.003              | 0.001             | <i>kabuli</i> | ITA     | Italy            | landrace          |
| INCCP_00049        | DA                   | -   | 0.003              | 0.001             | <i>kabuli</i> | ITA     | Italy            | landrace          |
| INCCP_00102        | DR                   | -   | 0.001              | 0.004             | <i>kabuli</i> | TUN     | Nord Africa      | landrace          |
| INCCP_00102        | DA                   | -   | 0.001              | 0.004             | <i>kabuli</i> | TUN     | Nord Africa      | landrace          |
| INCCP_00103        | -                    | 42  | 13.01              | 15.18             | <i>desi</i>   | TUN     | Nord Africa      | landrace          |
| INCCP_00103        | DR                   | -   | 0.005              | 0.007             | <i>desi</i>   | TUN     | Nord Africa      | landrace          |
| INCCP_00103        | DA                   | -   | 0.005              | 0.007             | <i>desi</i>   | TUN     | Nord Africa      | landrace          |
| <b>INCCP_00119</b> | -                    | 28  | 7.74               | 0.89              | <i>desi</i>   | TUR     | Turkey           | landrace          |
| <b>INCCP_00119</b> | -                    | 42  | 44.94              | 13.03             | <i>desi</i>   | TUR     | Turkey           | landrace          |
| <b>INCCP_00119</b> | DT                   | -   | 0.003              | 8.922             | <i>desi</i>   | TUR     | Turkey           | landrace          |
| <b>INCCP_00119</b> | DR                   | -   | 0.008              | 0.009             | <i>desi</i>   | TUR     | Turkey           | landrace          |
| <b>INCCP_00119</b> | DA                   | -   | 0.008              | 0.009             | <i>desi</i>   | TUR     | Turkey           | landrace          |

|                    |    |    |        |       |               |     |                   |          |
|--------------------|----|----|--------|-------|---------------|-----|-------------------|----------|
| <b>INCCP_00139</b> | -  | 28 | 24.43  | 5.86  | <i>desi</i>   | TJK | Asia              | landrace |
| <b>INCCP_00139</b> | -  | 42 | 102.41 | 28.67 | <i>desi</i>   | TJK | Asia              | landrace |
| <b>INCCP_00139</b> | DT | -  | 0.005  | 0.357 | <i>desi</i>   | TJK | Asia              | landrace |
| <b>INCCP_00139</b> | DR | -  | 0.013  | 0.011 | <i>desi</i>   | TJK | Asia              | landrace |
| <b>INCCP_00139</b> | DA | -  | 0.013  | 0.011 | <i>desi</i>   | TJK | Asia              | landrace |
| INCCP_00154        | -  | 28 | 25.85  | 2.05  | <i>kabuli</i> | HUN | East Europe       | cultivar |
| INCCP_00193        | -  | 28 | 38.61  | 3.58  | <i>desi</i>   | AFG | Asia              | landrace |
| INCCP_00193        | -  | 42 | 103.92 | 25    | <i>desi</i>   | AFG | Asia              | landrace |
| INCCP_00193        | DR | -  | 0.011  | 0.005 | <i>desi</i>   | AFG | Asia              | landrace |
| INCCP_00193        | DA | -  | 0.011  | 0.005 | <i>desi</i>   | AFG | Asia              | landrace |
| INCCP_00216        | -  | 28 | 36.98  | 4.13  | <i>desi</i>   | MKD | Balkan Europe     | cultivar |
| INCCP_00216        | -  | 42 | 50.48  | 10.34 | <i>desi</i>   | MKD | Balkan Europe     | cultivar |
| INCCP_00216        | DR | -  | 0      | 0.002 | <i>desi</i>   | MKD | Balkan Europe     | cultivar |
| INCCP_00216        | DA | -  | 0      | 0.002 | <i>desi</i>   | MKD | Balkan Europe     | cultivar |
| INCCP_00232        | -  | 28 | 9.44   | 1.56  | <i>desi</i>   | ESP | Iberian Peninsula | cultivar |
| INCCP_00232        | -  | 42 | 25.89  | 2.88  | <i>desi</i>   | ESP | Iberian Peninsula | cultivar |
| INCCP_00232        | DR | -  | 0.002  | 0.002 | <i>desi</i>   | ESP | Iberian Peninsula | cultivar |
| INCCP_00232        | DA | -  | 0.002  | 0.002 | <i>desi</i>   | ESP | Iberian Peninsula | cultivar |
| <b>INCCP_00291</b> | -  | 28 | 37.73  | 5.74  | <i>desi</i>   | MEX | Central America   | cultivar |
| <b>INCCP_00291</b> | -  | 42 | 83.76  | 31.04 | <i>desi</i>   | MEX | Central America   | cultivar |
| <b>INCCP_00291</b> | DT | -  | 0.007  | 0.096 | <i>desi</i>   | MEX | Central America   | cultivar |
| <b>INCCP_00291</b> | DR | -  | 0.008  | 0.009 | <i>desi</i>   | MEX | Central America   | cultivar |
| <b>INCCP_00291</b> | DA | -  | 0.008  | 0.009 | <i>desi</i>   | MEX | Central America   | cultivar |
| INCCP_00295        | -  | 28 | 17.31  | 1.41  | <i>desi</i>   | PAK | Indian Continent  | cultivar |
| INCCP_00295        | -  | 42 | 67.04  | 17.5  | <i>desi</i>   | PAK | Indian Continent  | cultivar |
| INCCP_00295        | DR | -  | 0.011  | 0.007 | <i>desi</i>   | PAK | Indian Continent  | cultivar |
| INCCP_00295        | DA | -  | 0.011  | 0.007 | <i>desi</i>   | PAK | Indian Continent  | cultivar |
| INCCP_00372        | -  | 28 | 22.14  | 3.73  | <i>desi</i>   | TUR | Turkey            | landrace |
| INCCP_00372        | -  | 42 | 40.13  | 16.53 | <i>desi</i>   | TUR | Turkey            | landrace |
| INCCP_00372        | DR | -  | 0.004  | 0.005 | <i>desi</i>   | TUR | Turkey            | landrace |

|             |    |    |        |       |             |     |                  |                       |
|-------------|----|----|--------|-------|-------------|-----|------------------|-----------------------|
| INCCP_00372 | DA | -  | 0.004  | 0.005 | <i>desi</i> | TUR | Turkey           | landrace              |
| INCCP_00429 | -  | 28 | 36.17  | 0.77  | <i>desi</i> | PAK | Indian Continent | landrace              |
| INCCP_00429 | -  | 42 | 81.08  | 12.51 | <i>desi</i> | PAK | Indian Continent | landrace              |
| INCCP_00429 | DR | -  | 0.01   | 0.005 | <i>desi</i> | PAK | Indian Continent | landrace              |
| INCCP_00429 | DA | -  | 0.01   | 0.005 | <i>desi</i> | PAK | Indian Continent | landrace              |
| INCCP_00438 | -  | 28 | 23.29  | 3.57  | <i>desi</i> | CHN | Asia             | landrace              |
| INCCP_00438 | -  | 42 | 45.28  | 5.85  | <i>desi</i> | CHN | Asia             | landrace              |
| INCCP_00438 | DR | -  | 0.001  | 0.004 | <i>desi</i> | CHN | Asia             | landrace              |
| INCCP_00438 | DA | -  | 0.001  | 0.004 | <i>desi</i> | CHN | Asia             | landrace              |
| INCCP_00447 | -  | 28 | 19.21  | 3.39  | <i>desi</i> | ETH | Ethiopia         | landrace              |
| INCCP_00447 | -  | 42 | 84.73  | 28.53 | <i>desi</i> | ETH | Ethiopia         | landrace              |
| INCCP_00447 | DR | -  | 0.01   | 0.006 | <i>desi</i> | ETH | Ethiopia         | landrace              |
| INCCP_00447 | DA | -  | 0.01   | 0.006 | <i>desi</i> | ETH | Ethiopia         | landrace              |
| INCCP_00466 | -  | 28 | 38.24  | 3.38  | <i>desi</i> | BGD | Indian Continent | cultivar              |
| INCCP_00466 | -  | 42 | 128.94 | 30.87 | <i>desi</i> | BGD | Indian Continent | cultivar              |
| INCCP_00466 | DR | -  | 0.019  | 0.014 | <i>desi</i> | BGD | Indian Continent | cultivar              |
| INCCP_00466 | DA | -  | 0.019  | 0.014 | <i>desi</i> | BGD | Indian Continent | cultivar              |
| INCCP_00470 | -  | 28 | 35.95  | 4.58  | <i>desi</i> | UZB | Asia             | domesticated material |
| INCCP_00470 | -  | 42 | 44.83  | 14.63 | <i>desi</i> | UZB | Asia             | domesticated material |
| INCCP_00470 | DT | -  | 0.008  | 0.368 | <i>desi</i> | UZB | Asia             | domesticated material |
| INCCP_00470 | DR | -  | 0.003  | 0.008 | <i>desi</i> | UZB | Asia             | domesticated material |
| INCCP_00470 | DA | -  | 0.003  | 0.008 | <i>desi</i> | UZB | Asia             | domesticated material |
| INCCP_00480 | -  | 28 | 25.85  | 3.57  | <i>desi</i> | MDA | Balkan Europe    | landrace              |
| INCCP_00480 | -  | 42 | 68.3   | 15.88 | <i>desi</i> | MDA | Balkan Europe    | landrace              |
| INCCP_00486 | -  | 28 | 5.46   | 3.8   | <i>desi</i> | AUS | Others           | cultivar              |
| INCCP_00486 | -  | 42 | 52.97  | 14.57 | <i>desi</i> | AUS | Others           | cultivar              |
| INCCP_00486 | DR | -  | 0.005  | 0.01  | <i>desi</i> | AUS | Others           | cultivar              |
| INCCP_00486 | DA | -  | 0.005  | 0.01  | <i>desi</i> | AUS | Others           | cultivar              |
| INCCP_00508 | -  | 28 | 6.83   | 2.06  | <i>desi</i> | SYR | Middle East      | breeding material     |
| INCCP_00508 | -  | 42 | 20.62  | 18.04 | <i>desi</i> | SYR | Middle East      | breeding material     |



|                    |    |    |       |       |               |     |                   |                   |
|--------------------|----|----|-------|-------|---------------|-----|-------------------|-------------------|
| INCCP_00508        | DR | -  | 0.004 | 0.01  | <i>desi</i>   | SYR | Middle East       | breeding material |
| INCCP_00508        | DA | -  | 0.004 | 0.01  | <i>desi</i>   | SYR | Middle East       | breeding material |
| INCCP_00512        | DR | -  | 0.007 | 0.002 | <i>kabuli</i> | ESP | Iberian Peninsula | breeding material |
| INCCP_00512        | DA | -  | 0.007 | 0.002 | <i>kabuli</i> | ESP | Iberian Peninsula | breeding material |
| INCCP_00573        | -  | 28 | 31.9  | 4.33  | <i>desi</i>   | IND | Indian Continent  | landrace          |
| INCCP_00573        | -  | 42 | 81.01 | 35.38 | <i>desi</i>   | IND | Indian Continent  | landrace          |
| INCCP_00573        | DR | -  | 0.011 | 0.012 | <i>desi</i>   | IND | Indian Continent  | landrace          |
| INCCP_00573        | DA | -  | 0.011 | 0.012 | <i>desi</i>   | IND | Indian Continent  | landrace          |
| INCCP_01429        | DR | -  | 0.007 | 0.003 | <i>kabuli</i> | CYP | Middle East       | landrace          |
| INCCP_01429        | DA | -  | 0.007 | 0.003 | <i>kabuli</i> | CYP | Middle East       | landrace          |
| INCCP_01461        | DR | -  | 0.001 | 0.001 | <i>kabuli</i> | TUR | Turkey            | landrace          |
| INCCP_01461        | DA | -  | 0.001 | 0.001 | <i>kabuli</i> | TUR | Turkey            | landrace          |
| INCCP_01615        | -  | 28 | 24.52 | 2.47  | <i>kabuli</i> | SYR | Middle East       | landrace          |
| INCCP_01615        | -  | 42 | 61.86 | 10.28 | <i>kabuli</i> | SYR | Middle East       | landrace          |
| INCCP_01615        | DR | -  | 0.009 | 0.006 | <i>kabuli</i> | SYR | Middle East       | landrace          |
| INCCP_01615        | DA | -  | 0.009 | 0.006 | <i>kabuli</i> | SYR | Middle East       | landrace          |
| INCCP_01867        | DR | -  | 0.005 | 0.003 | <i>kabuli</i> | KAZ | Asia              | landrace          |
| INCCP_01867        | DA | -  | 0.005 | 0.003 | <i>kabuli</i> | KAZ | Asia              | landrace          |
| <b>INCCP_01917</b> | -  | 28 | 13.48 | 0.91  | <i>kabuli</i> | PRT | Iberian Peninsula | landrace          |
| <b>INCCP_01917</b> | -  | 42 | 25.49 | 3.32  | <i>kabuli</i> | PRT | Iberian Peninsula | landrace          |
| <b>INCCP_01917</b> | DT | -  | 0.003 | 9.04  | <i>kabuli</i> | PRT | Iberian Peninsula | landrace          |
| <b>INCCP_01917</b> | DR | -  | 0.002 | 0.003 | <i>kabuli</i> | PRT | Iberian Peninsula | landrace          |
| <b>INCCP_01917</b> | DA | -  | 0.002 | 0.003 | <i>kabuli</i> | PRT | Iberian Peninsula | landrace          |

Table S12: Description of Plant Material.

| Genotype    | DOI            | Line Code<br>UNIVPM | Synonym1            | Synonym2  | Type Of<br>Chickpea | Country | Geographic<br>Area | Biological<br>Status | Donor<br>Institute |
|-------------|----------------|---------------------|---------------------|-----------|---------------------|---------|--------------------|----------------------|--------------------|
| INCCP_00004 | 10.18730/Z8H4J | AN_Ca_0005          | CIC 235             | 95469     | <i>kabuli</i>       | ALB     | Balkanica Europe   | landrace             | IPK                |
| INCCP_00006 | 10.18730/Z8HN= | AN_Ca_0009          | CIC 63              | 44726     | <i>desi</i>         | BGR     | Balkanica Europe   | breeding material    | IPK                |
| INCCP_00009 | 10.18730/Z8FF2 | AN_Ca_0015          | CIC 118             | 44780     | <i>desi</i>         | EGY     | Nord Africa        | landrace             | IPK                |
| INCCP_00015 | 10.18730/Z8GJ0 | AN_Ca_0024          | CIC 18              | 44681     | <i>desi</i>         | GRC     | Balkanica Europe   | landrace             | IPK                |
| INCCP_00017 | 10.18730/Z8GWA | AN_Ca_0026          | CIC 21              | 44684     | <i>desi</i>         | GRC     | Balkanica Europe   | landrace             | IPK                |
| INCCP_00034 | 10.18730/Z8FG3 | AN_Ca_0053          | CIC 124             | 44786     | <i>desi</i>         | ITA     | Italy              | landrace             | IPK                |
| INCCP_00049 | 10.18730/Z8JNY | AN_Ca_0077          | CIC 91              | 78711     | <i>kabuli</i>       | ITA     | Italy              | landrace             | IPK                |
| INCCP_00078 | 10.18730/Z8G8V | AN_Ca_0124          | CIC 160             | 79870     | <i>kabuli</i>       | ITA     | Italy              | landrace             | IPK                |
| INCCP_00100 | 10.18730/Z8JJV | AN_Ca_0169          | CIC 84              | 44747     | <i>kabuli</i>       | SVK     | East Europe        | landrace             | IPK                |
| INCCP_00102 | 10.18730/Z8GV9 | AN_Ca_0172          | CIC 203             | 55301     | <i>kabuli</i>       | TUN     | Nord Africa        | landrace             | IPK                |
| INCCP_00103 | 10.18730/Z8H5K | AN_Ca_0175          | CIC 237             | 95476     | <i>desi</i>         | TUN     | Nord Africa        | landrace             | IPK                |
| INCCP_00119 | 10.18730/Z8JHT | AN_Ca_0197          | CIC 8               | 44671     | <i>desi</i>         | TUR     | Turkey             | landrace             | IPK                |
| INCCP_00139 | 10.18730/ZACT4 | AN_Ca_0224          | USSR-05-03-BD       | W6 3498   | <i>desi</i>         | TJK     | Asia               | landrace             | USDA               |
| INCCP_00149 | 10.18730/ZA0ST | AN_Ca_0238          | OBRAZTZOV CHIFLIK 1 | W6 10046  | <i>kabuli</i>       | BGR     | Balkanica Europe   | landrace             | USDA               |
| INCCP_00154 | 10.18730/ZA10~ | AN_Ca_0243          | BEKESCSABAI 2       | W6 11071  | <i>kabuli</i>       | HUN     | East Europe        | cultivar             | USDA               |
| INCCP_00159 | 10.18730/ZA151 | AN_Ca_0248          | 1204/86             | W6 11077  | <i>desi</i>         | FRA     | West Europe        | landrace             | USDA               |
| INCCP_00160 | 10.18730/ZA162 | AN_Ca_0249          | 1658/85             | W6 11078  | <i>kabuli</i>       | ROU     | Balkanica Europe   | landrace             | USDA               |
| INCCP_00161 | 10.18730/ZA173 | AN_Ca_0250          | 125/84              | W6 11079  | <i>desi</i>         | HUN     | East Europe        | landrace             | USDA               |
| INCCP_00163 | 10.18730/ZA195 | AN_Ca_0252          | 417                 | W6 11081  | <i>desi</i>         | DEU     | West Europe        | landrace             | USDA               |
| INCCP_00165 | 10.18730/ZA1B7 | AN_Ca_0254          | Krokhmal #2         | W6 11343  | <i>kabuli</i>       | UKR     | East Europe        | cultivar             | USDA               |
| INCCP_00166 | 10.18730/ZA1C8 | AN_Ca_0255          | Krokhmal #3         | W6 11344  | <i>desi</i>         | UKR     | East Europe        | cultivar             | USDA               |
| INCCP_00190 | 10.18730/ZA24* | AN_Ca_0287          | ILC 191             | W6 14954  | <i>kabuli</i>       | RUS     | Asia               | landrace             | USDA               |
| INCCP_00193 | 10.18730/Z8MGF | AN_Ca_0290          | NO. 12620           | PI 207470 | <i>desi</i>         | AFG     | Asia               | landrace             | USDA               |
| INCCP_00216 | 10.18730/Z8N71 | AN_Ca_0315          | RUDNICKI            | PI 370420 | <i>desi</i>         | MKD     | Balkanica Europe   | cultivar             | USDA               |
| INCCP_00219 | 10.18730/Z8NA4 | AN_Ca_0318          | KLISURSKI           | PI 379220 | <i>desi</i>         | MKD     | Balkanica Europe   | cultivar             | USDA               |
| INCCP_00230 | 10.18730/Z8NNF | AN_Ca_0330          | PEDROSILLANO        | PI 533672 | <i>kabuli</i>       | ESP     | Iberian Peninsula  | cultivar             | USDA               |

|             |                |            |                       |           |               |     |                   |                       |      |
|-------------|----------------|------------|-----------------------|-----------|---------------|-----|-------------------|-----------------------|------|
| INCCP_00232 | 10.18730/Z8NQH | AN_Ca_0334 | NEGRO VICOS           | PI 533676 | <i>desi</i>   | ESP | Iberian Peninsula | cultivar              | USDA |
| INCCP_00251 | 10.18730/Z8PAU | AN_Ca_0365 | CALIA                 | PI 572508 | <i>kabuli</i> | ITA | Italy             | cultivar              | USDA |
| INCCP_00291 | 10.18730/Z8QJ2 | AN_Ca_0410 | PORQUERO NEGRO        | PI 577014 | <i>desi</i>   | MEX | Central America   | cultivar              | USDA |
| INCCP_00295 | 10.18730/Z8QP6 | AN_Ca_0418 | CM1913                | PI 577022 | <i>desi</i>   | PAK | Indian continent  | cultivar              | USDA |
| INCCP_00298 | 10.18730/Z8QS9 | AN_Ca_0421 | CM-1                  | PI 577026 | <i>desi</i>   | PAK | Indian continent  | cultivar              | USDA |
| INCCP_00372 | 10.18730/Z8RFZ | AN_Ca_0501 | 300685-0703D          | PI 595967 | <i>desi</i>   | TUR | Turkey            | landrace              | USDA |
| INCCP_00429 | 10.18730/ZA3YG | AN_Ca_0562 | WKP 88-57             | W6 17612  | <i>desi</i>   | PAK | Indian continent  | landrace              | USDA |
| INCCP_00438 | 10.18730/ZA2G7 | AN_Ca_0571 | W6 17431              | W6 17431  | <i>desi</i>   | CHN | Asia              | landrace              | USDA |
| INCCP_00447 | 10.18730/ZA2SG | AN_Ca_0580 | ICC 8578              | W6 17447  | <i>desi</i>   | ETH | Ethiopia          | landrace              | USDA |
| INCCP_00466 | 10.18730/Z8TX= | AN_Ca_0600 | Barichhola 5          | PI 596369 | <i>desi</i>   | BGD | Indian continent  | cultivar              | USDA |
| INCCP_00470 | 10.18730/ZA46R | AN_Ca_0604 | W6 19245              | W6 19245  | <i>desi</i>   | UZB | Asia              | domesticated material | USDA |
| INCCP_00480 | 10.18730/ZA4CY | AN_Ca_0614 | Floreshtskiy 58/76    | W6 19957  | <i>desi</i>   | MDA | Balkan Europe     | landrace              | USDA |
| INCCP_00486 | 10.18730/Z8V34 | AN_Ca_0620 | HEERA                 | PI 612246 | <i>desi</i>   | AUS | others            | cultivar              | USDA |
| INCCP_00488 | 10.18730/ZA4H= | AN_Ca_0622 | ILC 72 (differential) | W6 22575  | <i>kabuli</i> | USA | USA               | landrace              | USDA |
| INCCP_00508 | 10.18730/Z8V89 | AN_Ca_0642 | ILC 10766             | PI 629018 | <i>desi</i>   | SYR | Middle East       | breeding material     | USDA |
| INCCP_00509 | 10.18730/ZA56K | AN_Ca_0643 | ARM 172               | W6 23903  | <i>desi</i>   | ARM | Caucasus          | domesticated material | USDA |
| INCCP_00512 | 10.18730/Z8V9A | AN_Ca_0646 | CA2969                | PI 632396 | <i>kabuli</i> | ESP | Iberian Peninsula | breeding material     | USDA |
| INCCP_00573 | 10.18730/ZA703 | AN_Ca_0713 | ICC 14077             | W6 25914  | <i>desi</i>   | IND | Indian continent  | landrace              | USDA |
| INCCP_00700 | 10.18730/ZAAYJ | AN_Ca_0844 | G2503                 | W6 26156  | <i>kabuli</i> | GEO | Caucasus          | landrace              | USDA |
| INCCP_00709 | 10.18730/ZAB6T | AN_Ca_0853 | TJK04:11-067          | W6 26223  | <i>kabuli</i> | TJK | Asia              | landrace              | USDA |
| INCCP_00792 | 10.18730/Z8WWR | AN_Ca_0940 | ILC 176               | PI 670537 | <i>kabuli</i> | MAR | Nord Africa       | landrace              | USDA |
| INCCP_00853 | 10.18730/Z8YSB | AN_Ca_1008 | ILC 563               | PI 670605 | <i>kabuli</i> | LBN | Middle East       | landrace              | USDA |
| INCCP_00918 | 10.18730/Z90T2 | AN_Ca_1074 | ILC 1116              | PI 670671 | <i>kabuli</i> | IRN | Middle East       | landrace              | USDA |
| INCCP_00955 | 10.18730/Z91Z2 | AN_Ca_1111 | ILC 1759              | PI 670720 | <i>kabuli</i> | CHL | South America     | landrace              | USDA |
| INCCP_01244 | 10.18730/Z9B0* | AN_Ca_1408 | ILC 4312              | PI 671021 | <i>kabuli</i> | ESP | Iberian Peninsula | landrace              | USDA |
| INCCP_01283 | 10.18730/Z9C7S | AN_Ca_1447 | ILC 4427              | PI 671060 | <i>kabuli</i> | UZB | Asia              | landrace              | USDA |
| INCCP_01396 | 10.18730/Z9FRU | AN_Ca_1561 | ILC 4992              | PI 671175 | <i>kabuli</i> | SYR | Middle East       | landrace              | USDA |
| INCCP_01429 | 10.18730/Z9GS* | AN_Ca_1595 | ILC 5558              | PI 671209 | <i>kabuli</i> | CYP | Middle East       | landrace              | USDA |

|             |                |            |           |           |               |     |                   |          |      |
|-------------|----------------|------------|-----------|-----------|---------------|-----|-------------------|----------|------|
| INCCP_01461 | 10.18730/Z9HSV | AN_Ca_1628 | ILC 5791  | PI 671242 | <i>kabuli</i> | TUR | Turkey            | landrace | USDA |
| INCCP_01596 | 10.18730/Z9P0E | AN_Ca_1767 | ILC 6146  | PI 671383 | <i>kabuli</i> | PRT | Iberian Peninsula | landrace | USDA |
| INCCP_01607 | 10.18730/Z9PBS | AN_Ca_1778 | ILC 6193  | PI 671394 | <i>kabuli</i> | DZA | Nord Africa       | landrace | USDA |
| INCCP_01615 | 10.18730/Z9PK~ | AN_Ca_1786 | ILC 6264  | PI 671402 | <i>kabuli</i> | SYR | Middle East       | landrace | USDA |
| INCCP_01867 | 10.18730/Z9YFT | AN_Ca_2041 | ILC 9757  | PI 671659 | <i>kabuli</i> | KAZ | Asia              | landrace | USDA |
| INCCP_01917 | 10.18730/ZA012 | AN_Ca_2091 | ILC 11968 | PI 671748 | <i>kabuli</i> | PRT | Iberian Peninsula | landrace | USDA |
